# Supplementary material for: Engaging U.S. Adults with Serious Mental Illness in Participatory Design Research Exercises
Source: MDPI journal article supplement (doi:10.3390/ijerph19116743), 2022-05-31
Supplement: s1 [file s1]

*Supplementary Material for*

# **Engaging U.S. Adults with Serious Mental Illness in Participatory Design Research Exercises**

**Kimberly A. Rollings**

<sup>1</sup> School of Architecture and the Department of Psychology, University of Notre Dame, Notre Dame, IN 46556, USA; kirollin@umich.edu

<sup>2</sup> Health and Design Research Fellow, Institute for Healthcare Policy and Innovation, University of Michigan, Ann Arbor, MI 48109, USA

1. Clubhouse Questionnaire (Form S1)
2. Clubhouse Space Priorities (Form S2)
3. Questionnaire Results (Tables S1a-S1d)
4. Design Project Feedback Results (Table S2)

## 1. Clubhouse Questionnaire (Form S1)

*The Working Group, professors, and students [REDACTED] are documenting information about the design of Clubhouse buildings and spaces. Please complete the following questions. All responses will remain confidential.*

1a. I am a (circle one): Former Clubhouse Member      Future Clubhouse Member  
Staff member      Other: \_\_\_\_\_

1b. How much time, on average, did you spend at the former Clubhouse each week?  
\_\_\_\_\_ days per week, and \_\_\_\_\_ hours per day on average

1c. During what hours did you typically visit the Clubhouse? Circle all that apply.

a. Morning    b. Afternoon    c. All day

**2. How did you travel to and from the Clubhouse? Circle all that apply.**

a. Car (own/borrowed)                  c. Bus                  e. Bike                  g. Taxi  
b. Carpool                                  d. Walk                f. Train                h. Other: \_\_\_\_\_

3a. What work units and services did the Clubhouse offer? Circle all that apply.

|                         |                        |                    |
|-------------------------|------------------------|--------------------|
| a. Clerical/office      | g. Gardening           | l. Housing         |
| b. Attendance records   | h. Artistic activities | m. Outreach        |
| c. Accounting/financial | i. Recreational/social | n. Transportation  |
| d. Food prep/serving    | events                 | o. Health services |
| e. Maintenance/cleaning | j. Education           | p. Case management |
| f. Thrift store/retail  | k. Employment          | q. Other: _____    |

3b. List the work unit(s) in which you were involved: \_\_\_\_\_

3c. Which additional units or services should a future Clubhouse offer? List all that apply:

**4a. Did any work units or activities share a space in the Clubhouse? If yes, which ones?**

4b. If yes, was sharing a space a problem? Why or why not? \_\_\_\_\_

5a. What was your *favorite* space in the Clubhouse? Circle one.

a. Entryway/lobby                      f. Kitchen                      k. Elevator  
b. Stair hall                              g. Snack bar                      l. Restroom  
c. Office                                  h. Library                      m. Parking lot  
d. Work room                            i. Classroom                      n. Other: \_\_\_\_\_  
e. Dining room                          j. Outdoor space

5b. Why is that space your *favorite* space? \_\_\_\_\_

5c. How much time, on average, did you spend each day in that space? \_\_\_\_\_

6a. List your *least* favorite space in the Clubhouse: \_\_\_\_\_

6b. Why is the space your *least* favorite? \_\_\_\_\_

6c. How much time did you spend each day in that space? \_\_\_\_\_

7. Think about the Clubhouse *building* and *spaces*. What makes the Clubhouse facility different from a healthcare facility? (*Think about the lighting, sounds, odors, colors, entry, materials, furnishings, the way you are greeted, how you feel when you are there, etc.*) \_\_\_\_\_

8a. What was your favorite activity in the Clubhouse? Why? \_\_\_\_\_

8b. What was your *least* favorite activity in the Clubhouse? Why? \_\_\_\_\_

9a. What were your responsibilities and roles in the former Clubhouse? \_\_\_\_\_

9b. What made your responsibilities easier (*e.g., enough supplies, space, light, help*)? \_\_\_\_\_

9c. What made your responsibilities more difficult (*e.g., not enough supplies, space, light, help*)? \_\_\_\_\_

10. What would make travel to and participation in Clubhouse activities easier for you (*financial resources, transportation, weather, cost, job hours, other reasons...*)? Why? \_\_\_\_\_

Personal information (optional; all individual responses remain anonymous and confidential):

I. Age \_\_\_\_\_ years

II. Gender \_\_\_\_\_

III. Education (*circle one*): some high school    high school    some college    college

IV. If you been diagnosed with a mental illness, will you please share the diagnosis with us? \_\_\_\_\_

\*\*\* Thank you for your participation! \*\*\*

## 2. CLUBHOUSE SPACE PRIORITIES (Form S2)

*Buildings are expensive. In order to understand what spaces and activities are critical to a new building, including a Clubhouse, clients often need to prioritize and cut items from their “wish lists.” Please look at the following list of potential Clubhouse spaces. With your group, decide whether each space listed here is a “must have” (1), “should have” (2), or “could have” (3) space. You may use the cards and sort them into pockets if that is helpful.*

1. MUST: A required space, without which a new Clubhouse could not function.  
2. SHOULD: Should really be in a new Clubhouse, but could be eliminated if necessary.  
3. COULD: Would be very nice to have, but is more of a luxury.

|                             |                       |                            |
|-----------------------------|-----------------------|----------------------------|
| ____ Reception desk & lobby | ____ Exercise Room    | ____ Porch                 |
| ____ Work Room              | ____ Gallery          | ____ Bike Storage          |
| ____ Dining Room            | ____ Recreation Area  | ____ Garden                |
| ____ Café/Snack Bar         | ____ Lounge           | ____ Balcony               |
| ____ Kitchen                | ____ Library          | ____ Outdoor Space/Yard    |
| ____ Banking Office         | ____ Computer Room    | ____ Garage/Storage Shed   |
| ____ Director’s Office      | ____ Retail Space     | ____ Delivery Area         |
| ____ Employment Office      | ____ Fitting Room     | ____ Drop-off Area         |
| ____ Meeting Room           | ____ Donation Storage | ____ Parking               |
| ____ Restrooms              | ____ Visitor Lodging  | ____ Laundry/Mud Room      |
| ____ Administrative Office  | ____ Locker Room      | ____ Custodial Storage     |
| ____ Copy Center            | ____ Member Housing   | ____ Covered Outdoor Space |
| ____ Classroom              | ____ Stairs           | ____ Other _____           |
| ____ Audiovisual Studio     | ____ Elevator         | ____ Other _____           |
| ____ Arts and Crafts Studio | ____ Mechanical Room  | ____ Other _____           |

*You may add as many additional room types as needed, just be sure to also make a “card” for the space as well. Use the back of this sheet to explain your decisions, if there’s time.*

### 3. QUESTIONNAIRE RESULTS

**Table S1a.** Previous Clubhouse services and Member responsibilities according to Member questionnaire responses.

| Clubhouse services                |                         | Member responsibilities                                                                 |
|-----------------------------------|-------------------------|-----------------------------------------------------------------------------------------|
| 2 No response                     | 2 Outreach              | 6 No response                                                                           |
| 9 Food prep/serving               | 1 Artistic activities   | 7 Computer work: Menu (2), attendance records (3), newsletter (1), computer classes (1) |
| 6 Clerical/office                 | 1 Case management       | 3 Variety; <i>"I had a choice of activity," "Help out"</i> [where needed]               |
| 6 Education                       | 1 Garden                | 2 Fundraising, reach out, banking, statistics, teaching, leadership                     |
| 5 Accounting/financial            | 1 Health services       | 2 Retail: Cashier (2) and snack bar inventory (1)                                       |
| 5 Maintenance/cleaning            | 1 Housing               | 1 Education lab                                                                         |
| 3 Recreational/social events      | 1 Transportation        | 1 Cooking, serving lunch, and more                                                      |
| 3 Thrift store/snack bar (retail) | 1 Fellowship/counseling | 1 <i>"I took on a role of trust both with the staff and the members"</i>                |
| 2 Employment                      | 1 Library               |                                                                                         |

Numbers indicate the number of Member responses that included that item.

**Table S1b.** Factors that made Member responsibilities easier or more difficult, according to questionnaire responses.

| What made responsibilities easier?                                     | What made responsibilities difficult?                      |
|------------------------------------------------------------------------|------------------------------------------------------------|
| 9 No response                                                          | 8 No response + 1 not legible response                     |
| 3 Help/more help (1-from <i>"Students wanting to get their GEDs"</i> ) | 2 Space/rooms too small                                    |
| 2 More space, enough seating for lunch                                 | 2 Not enough supplies                                      |
| 1 <i>"Ease of maintenance was important"</i>                           | 1 Could always use help                                    |
| 1 Discussion                                                           | 1 [Computer] log-in problems                               |
| 1 Food delivery                                                        | 1 Me/depression                                            |
| 1 Working/available computer                                           | 1 <i>"People not showing up on time for their shift"</i>   |
| 1 <i>"Working with someone else"</i>                                   | 1 <i>"People just hanging out in the education lab"</i>    |
| 1 <i>"Knowing that I was making a difference"</i>                      | 1 <i>"[People] not having any mental health education"</i> |

Numbers indicate the number of Member responses that included that item.

**Table S1c.** Members' favorite and least favorite Clubhouse activities and why, according to questionnaire responses.

| Favorite Clubhouse Activities   Why |                                                                        | Least Favorite Clubhouse Activities   Why |                                                                                                                                   |
|-------------------------------------|------------------------------------------------------------------------|-------------------------------------------|-----------------------------------------------------------------------------------------------------------------------------------|
| 7 No response                       | --                                                                     | 7 No response                             | --                                                                                                                                |
| 1 Visit/tour                        | - <i>"Visiting, taking the tour, I didn't want to be in Clubhouse"</i> | 3 Mopping & Cleaning                      | - <i>"Cleaning; I don't especially like to clean;" "Cleaning bathrooms, but I did it willing as it was important to be clean"</i> |
| 1 Cooking                           | - <i>"Because I could quietly serve others"</i>                        | 1 Housekeeping                            | --                                                                                                                                |
| 1 Meal setup & dishwashing          | --                                                                     | 1 Computer                                | --                                                                                                                                |
| 1 Newsletter & clerical duties      | - <i>"I got to know more about individuals and their stories."</i>     | 1 Policing cigarette butts                | --                                                                                                                                |
| 1 Fundraising                       | - <i>"Selling candy bars, car washes, chicken sales"</i>               | 1 Cook out                                | --                                                                                                                                |
| 1 Helping others                    | - <i>"It kept me out of my own head."</i>                              | 1 Not much to do                          | --                                                                                                                                |
| 1 Get togethers                     | --                                                                     | 1 Talking in front of large groups        | - <i>"Really nothing to do w/ the space-except for the acoustics were bad in many rooms"</i>                                      |
| 1 Trips                             | --                                                                     |                                           |                                                                                                                                   |
| 1 Bingo                             | --                                                                     |                                           |                                                                                                                                   |
| 1 Tutoring                          | --                                                                     |                                           |                                                                                                                                   |

Numbers indicate the number of Member responses that included that item.

### 3. QUESTIONNAIRE RESULTS (continued)

**Table S1d.** Favorite and least favorite Clubhouse spaces and reasons, according to Member questionnaire responses.

| Favorite Clubhouse Space   Why |                                                                                                                                                                                                             | Least Favorite Space   Why |                                                                                                                        |
|--------------------------------|-------------------------------------------------------------------------------------------------------------------------------------------------------------------------------------------------------------|----------------------------|------------------------------------------------------------------------------------------------------------------------|
| 5                              | No response                                                                                                                                                                                                 | 7                          | No response                                                                                                            |
| 3                              | Outdoor space    Smoking                                                                                                                                                                                    | 2                          | Restroom    - "Cleaning the bathrooms"                                                                                 |
| 3                              | Entryway/ Lobby    - "Because this is how to show [visitors] how we feel about Clubhouse", greet guests, phone messages                                                                                     | 1                          | Cleaning    - "Takes too long and is sort of hard work"                                                                |
| 3                              | Dining room    - "There was a lot of conversation, eating, and caring there. And game playing"                                                                                                              | 1                          | Office    --                                                                                                           |
| 3                              | Snack bar    - "I liked working the cash register"                                                                                                                                                          | 1                          | Kitchen    - "Dull"                                                                                                    |
| 3                              | Classroom    --                                                                                                                                                                                             | 1                          | Thrift shop    - "Although when I did participate it was fulfilling"                                                   |
| 2                              | Computer room    - "Where I did the most fun jobs"; "place where I could learn, teach, and create such things as the newsletter, cards, track attendance, and other activities involving club organization" | 1                          | Chairs    - "There were no easy chairs I think"                                                                        |
| 2                              | Kitchen    - "Small so not as overwhelmed b/c smaller group"                                                                                                                                                | 1                          | Smoking porch    - "I am an anti-smoker"                                                                               |
| 1                              | Garden    -Relaxing                                                                                                                                                                                         | 1                          | Storage garage    - "Dark, stinky, lonely"                                                                             |
| 1                              | Library    --                                                                                                                                                                                               | 1                          | Meeting space    - "Big meetings & big meeting space tee hee= what was worse were big meetings in small meeting space" |
| 1                              | Elevator    --                                                                                                                                                                                              |                            |                                                                                                                        |
| 1                              | All    - "The whole building. I would do anything [any Clubhouse task in any space] to get out every day"                                                                                                   |                            |                                                                                                                        |

Numbers indicate the number of Member responses that included that item.

## 4. DESIGN PROJECT FEEDBACK RESULTS

**Table S2.** A summary of Member feedback on student Clubhouse design proposals.

|                                                                                                                                                                                                                                                                                                                                                                                                                                                                                                                                                                                                                                                                                                                                                                                                                                                                                                                                                                                                                                      |                                                                                                                                                                                                                                                                                                                                                                                                                                                                                                                          |
|--------------------------------------------------------------------------------------------------------------------------------------------------------------------------------------------------------------------------------------------------------------------------------------------------------------------------------------------------------------------------------------------------------------------------------------------------------------------------------------------------------------------------------------------------------------------------------------------------------------------------------------------------------------------------------------------------------------------------------------------------------------------------------------------------------------------------------------------------------------------------------------------------------------------------------------------------------------------------------------------------------------------------------------|--------------------------------------------------------------------------------------------------------------------------------------------------------------------------------------------------------------------------------------------------------------------------------------------------------------------------------------------------------------------------------------------------------------------------------------------------------------------------------------------------------------------------|
| <b>Future Clubhouse spaces, furnishings, and equipment</b> <ul style="list-style-type: none"> <li>- Café/snack bar with an ice cream bar, storage, and a juke box</li> <li>- Recreational space/game room (include clean-up rules) <ul style="list-style-type: none"> <li>Pool table (3), ping pong, foosball, Wii, variety of games</li> </ul> </li> <li>- Social room: Rocking chairs, gliders, bean bag chairs</li> <li>- Small dining room in addition to large (&amp; offer a variety of foods)</li> <li>- Copy space for printing news, letters, brochures</li> <li>- Paper shredder in the office</li> <li>- Indoor sunroom/garden room/atrium/courtyard</li> <li>- Indoor water feature; pond (2) for fish and meditation</li> <li>- Fitness room (2): bikes, treadmill, indoor pool and hot/whirlpool</li> <li>- Laundry area (&amp; clean thrift store clothing)</li> <li>- Two work areas &amp; computers for all work units (esp. kitchen group)</li> <li>- Outdoor area for car washes and other fundraisers</li> </ul> | <ul style="list-style-type: none"> <li>- Lobby/reception area (visible from entry)</li> <li>- Kitchen and pantry</li> <li>- Classroom (math and other activities)</li> <li>- Thrift store</li> <li>- Smoking area (3)</li> <li>- Garden (veggies &amp; shrubs)</li> <li>- Windows with a view</li> <li>- Public transportation and parking</li> <li>- Van (carpool)</li> <li>- Reading room/library</li> <li>- Television lounge</li> <li>- Bank</li> <li>- Space for creative work</li> <li>- Piano or organ</li> </ul> |
| <b>Ease of use and maintenance</b> <ul style="list-style-type: none"> <li>- Easy cleaning/maintaining of interior &amp; exterior spaces</li> <li>- One story easier to maintain than two</li> <li>- Snow removal considerations</li> <li>- Custodial storage on each floor</li> <li>- Lots of water hose outlets</li> <li>- Adequate electrical outlets</li> <li>- Pantry/food storage near service (delivery) entrance</li> <li>- Garden within close proximity of the kitchen</li> </ul>                                                                                                                                                                                                                                                                                                                                                                                                                                                                                                                                           | <b>Architecture/appearance</b> <ul style="list-style-type: none"> <li>- Combination of two common local “old” styles</li> <li>- Felt homey</li> <li>- Previous Clubhouse: Liked the woodwork</li> <li>- Openness</li> <li>- Lots of light like the former dining room</li> <li>- Avoid having any space feel utilitarian</li> </ul>                                                                                                                                                                                      |
| <b>Safety &amp; Security</b> <ul style="list-style-type: none"> <li>- Lockable front door</li> <li>- Supervision in the fitness area</li> <li>- Be forced to walk through different spaces (surveillance &amp; sociability)</li> <li>- First aid area</li> <li>- Lockers for secure storage of personal belongings</li> </ul>                                                                                                                                                                                                                                                                                                                                                                                                                                                                                                                                                                                                                                                                                                        | <b>Adaptability, flexibility &amp; accessibility</b> <ul style="list-style-type: none"> <li>- Ability to play music throughout via a sound system</li> <li>- Moveable partitions, e.g., for expanded dining/to create smaller spaces</li> <li>- Universally designed accessible entrances</li> </ul>                                                                                                                                                                                                                     |

Numbers indicate the number of Member responses that included that item. No number indicates one Member response.
